# Supplementary material for: Diversity of Self-Assembled RNA Complexes: From Nanoarchitecture to Nanomachines
Source: MDPI journal article supplement (doi:10.3390/molecules29010010), 2023-12-19
Supplement: s1 [file s1]

## Supplementary Materials

### Diversity of Self-Assembled RNA Complexes: From Nanoarchitecture to Nanomachines

Maria A. Kanarskaya, Dmitrii V. Pyshnyi and Alexander A. Lomzov \*

Institute of Chemical Biology and Fundamental Medicine SB RAS, Novosibirsk 630090, Russia; makanarskaya@gmail.com (M.A.K.); pyshnyi@niboch.nsc.ru (D.V.P.)

\*Correspondence: lomzov@niboch.nsc.ru; Tel.: +7-9130092889

|                                                     |    |
|-----------------------------------------------------|----|
| HPLC analysis of RNA hydrolysis .....               | 1  |
| UV-melting analysis.....                            | 2  |
| Gel shift assay analysis of the complex types ..... | 4  |
| Gel shift assay analysis of nanomachines .....      | 9  |
| Molecular dynamics simulation, and analysis.....    | 13 |

#### HPLC analysis of RNA hydrolysis

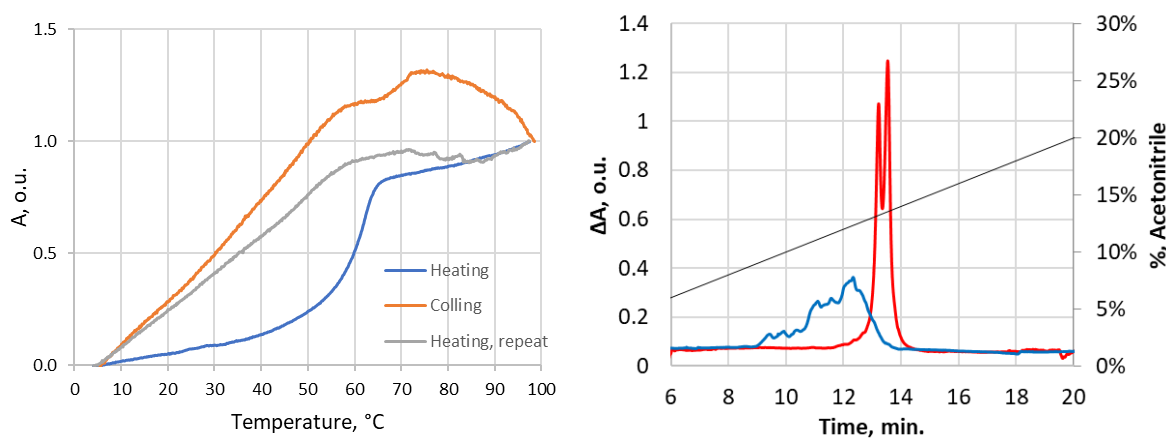

**Figure S1.** UV melting curves of M/N-U3 complex during heating, cooling and heating (left). RP-HPLC analysis of the complex before (red line) and after (blue line) the UV-melting experiment (right).

## UV-melting analysis

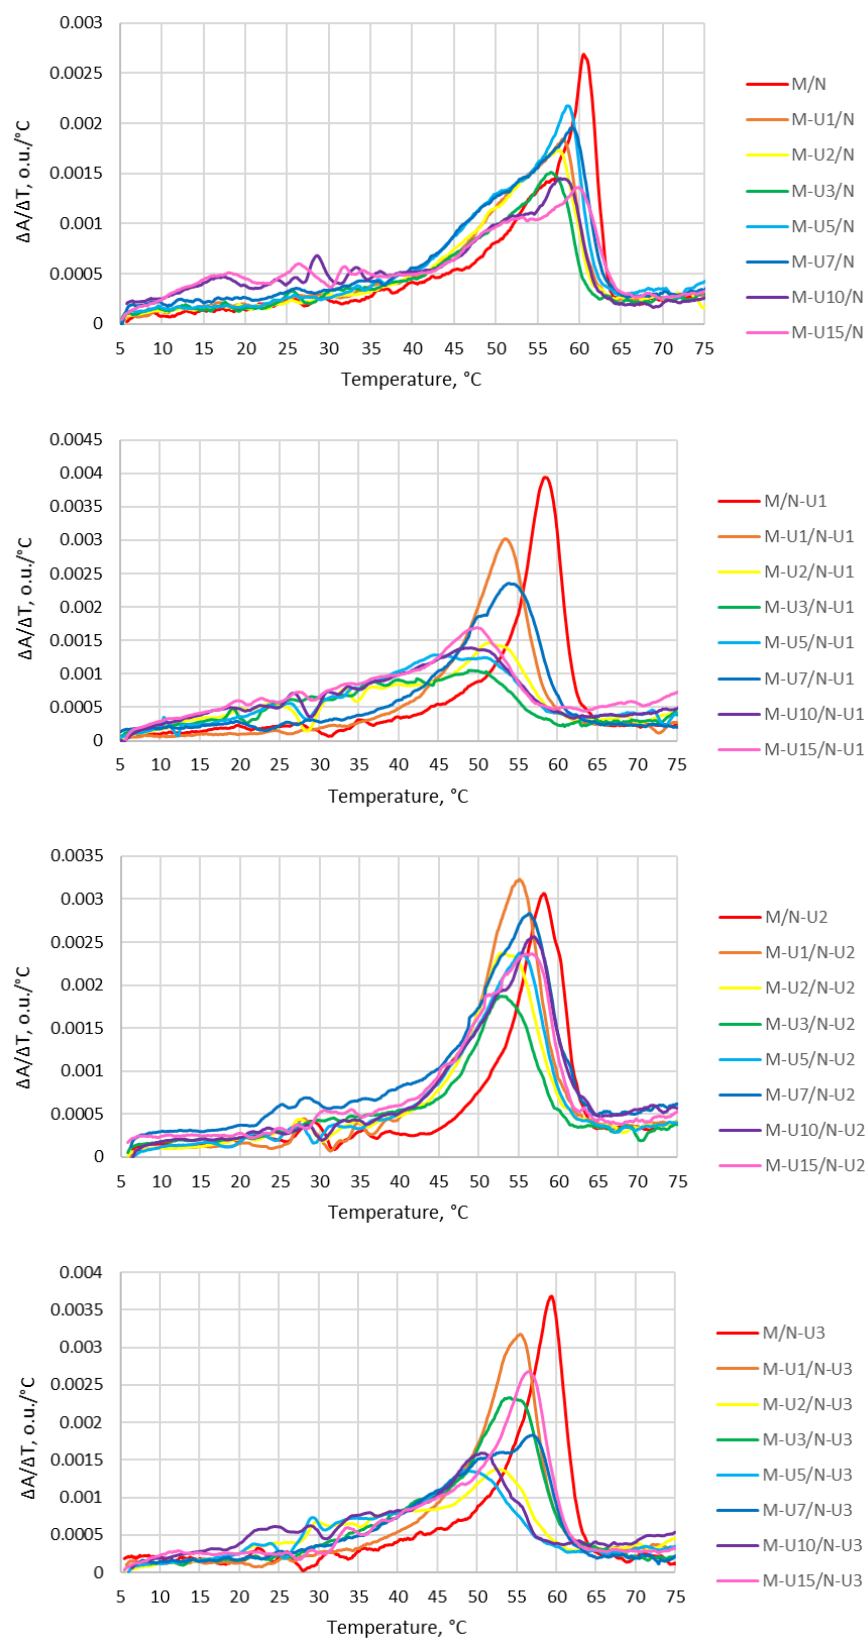

**Figure S2.** Differential UV melting curves of M-U<sub>i</sub>/N-U<sub>j</sub> complexes (i = 0, 1, 2, 3, 5, 7, 10, and 15; j = 0, 1, 2, and 3).

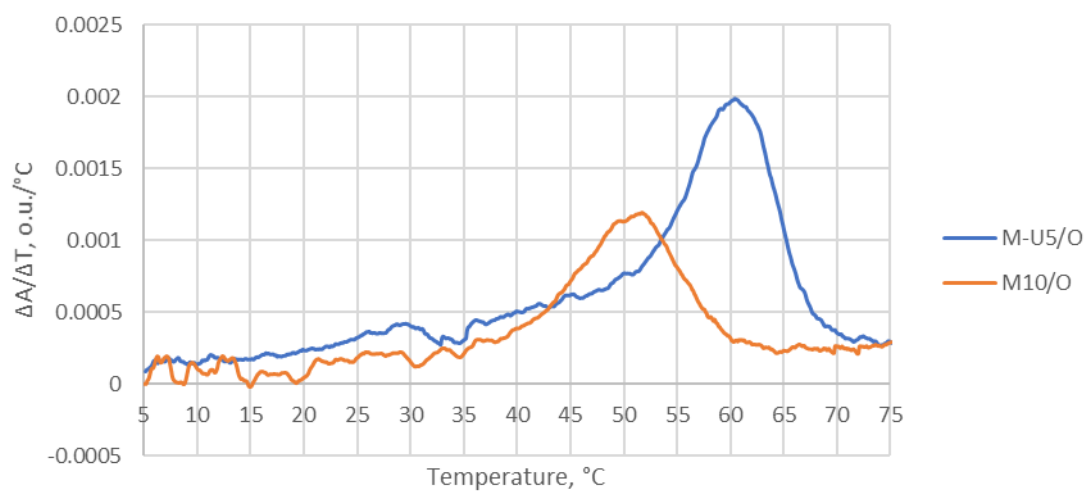

**Figure S3.** Differential UV melting curves of M-U5/O and M10/O complexes.

**Table S1.** Melting temperatures ( $T_m$ ) of the complexes are determined as a maximum of differential UV melting curves.

| Complex | $T_m$ , °C | Complex               | $T_m$ , °C |
|---------|------------|-----------------------|------------|
| M/O     | 54.0       | M10/O                 | 51.8       |
| M-U1/O  | 57.0       | N-U3/DNA <sup>1</sup> | 44.0       |
| M-U2/O  | 59.0       | O/C                   | 59.0       |
| M-U3/O  | 59.0       | M-U5/OL               | 69.0       |
| M-U5/O  | 60.8       | OL/CL                 | 73.0       |

<sup>1</sup> DNA opener 5'-d(CCATCATATGAAAA)-3'

## Gel shift assay analysis of the complex types

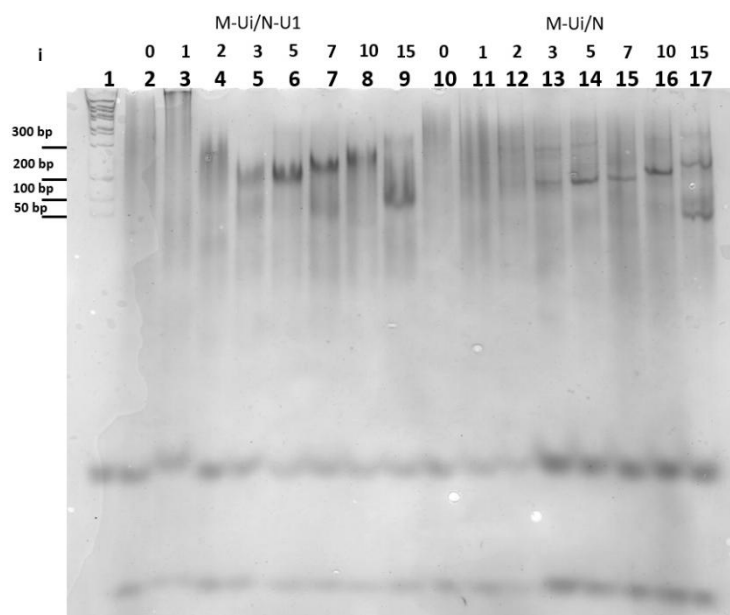

**Figure S4.** The gel shift assay of oligonucleotides' complexes M-U<sub>j</sub>/N-U1 and M-U<sub>j</sub>/N, j = 0, 1, 2, 3, 5, 7, 10, and 15. The order of complexes in electropherogramm, complexes' name, complex mobility, and type are shown in the Table S2. A dsDNA ladder of 50–1000 bp is shown on the left.

**Table S2.** Mobility, complex type, and size determined by analysis gel shift assays.

| La ne | Complex    | Mobility, bp   | Complex type/size |
|-------|------------|----------------|-------------------|
| 1     | Ladder     | -              |                   |
| 2     | M/N-U1     | -              | Conc              |
| 3     | M-U1/N-U1  | -              | Conc              |
| 4     | M-U2/N-U1  | c,280          | Conc,4            |
| 5     | M-U3/N-U1  | (100), 220     | (2),4             |
| 6     | M-U5/N-U1  | 220            | 4                 |
| 7     | M-U7/N-U1  | (100),250      | (2),4             |
| 8     | M-U10/N-U1 | 280            | 4                 |
| 9     | M-U15/N-U1 | 100, (300)     | 2(4)              |
| 10    | M/N        | -              | Conc              |
| 11    | M-U1/N     | -              | Conc              |
| 12    | M-U2/N     | c,(200), (300) | Conc, (4), (6)    |
| 13    | M-U3/N     | c,200, 300     | Conc, 4, 6        |
| 14    | M-U5/N     | c,200, 300     | Conc, 4, 6        |
| 15    | M-U7/N     | c,200          | Conc, 4           |
| 16    | M-U10/N    | c,220, (300)   | Conc, 4, (6)      |
| 17    | M-U15/N    | 50, 220, (350) | 2, 4, (6)         |

**Table S3.** Mobility, complex type, and size determined by analysis gel shift assays.

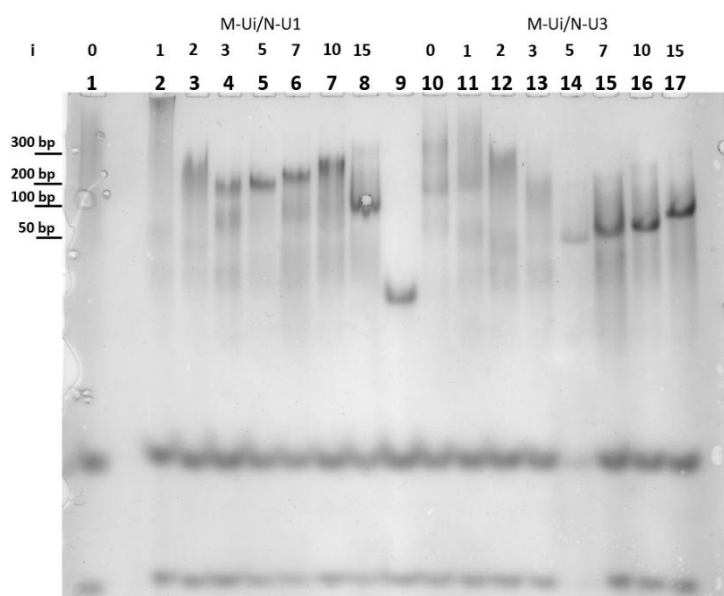

**Figure S5.** The gel shift assay of oligonucleotides' complexes M-U<sub>j</sub>/N-U1 and M-U<sub>j</sub>/N-U3, j = 0, 1, 2, 3, 5, 7, 10, and 15. The order of complexes in electropherogramm, complexes' name, complex mobility, and type are shown in the Table S3. A dsDNA ladder of 50–1000 bp is shown on the left.

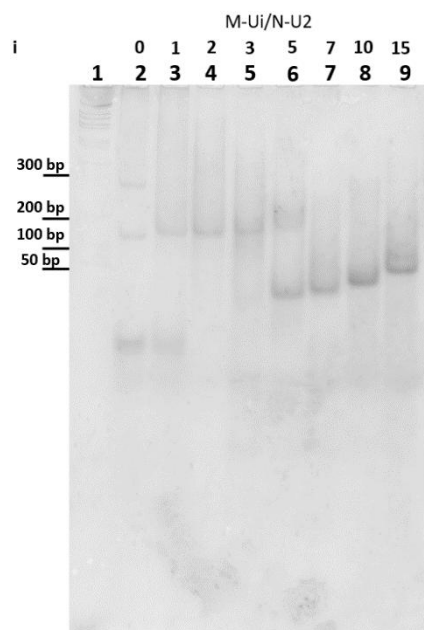

**Table S4.** Mobility, complex type, and size determined by analysis gel shift assays

| Lane | Complex                             | Mobility, bp | Complex type/size |
|------|-------------------------------------|--------------|-------------------|
| 1    | Маркер                              | -            |                   |
| 2    | M/N-U <sub>2</sub>                  | 180, 280     | Conc, 4, 6        |
| 3    | M-U <sub>1</sub> /N-U <sub>2</sub>  | 180          | Conc, 4           |
| 4    | M-U <sub>2</sub> /N-U <sub>2</sub>  | 180          | Conc, 4           |
| 5    | M-U <sub>3</sub> /N-U <sub>2</sub>  | (50), 180    | Conc, 4           |
| 6    | M-U <sub>5</sub> /N-U <sub>2</sub>  | 30, (180)    | 2, (4)            |
| 7    | M-U <sub>7</sub> /N-U <sub>2</sub>  | 30           | 2                 |
| 8    | M-U <sub>10</sub> /N-U <sub>2</sub> | 40           | 2                 |
| 9    | M-U <sub>15</sub> /N-U <sub>2</sub> | 50           | 2                 |

**Figure S6.** The gel shift assay of oligonucleotides' complexes M-U<sub>j</sub>/N-U<sub>2</sub>, j = 0, 1, 2, 3, 5, 7, 10, and 15. The order of complexes in electropherogram, complexes' name, complex mobility, and type are shown in the Table S4. A dsDNA ladder of 50–1000 bp is shown on the left.

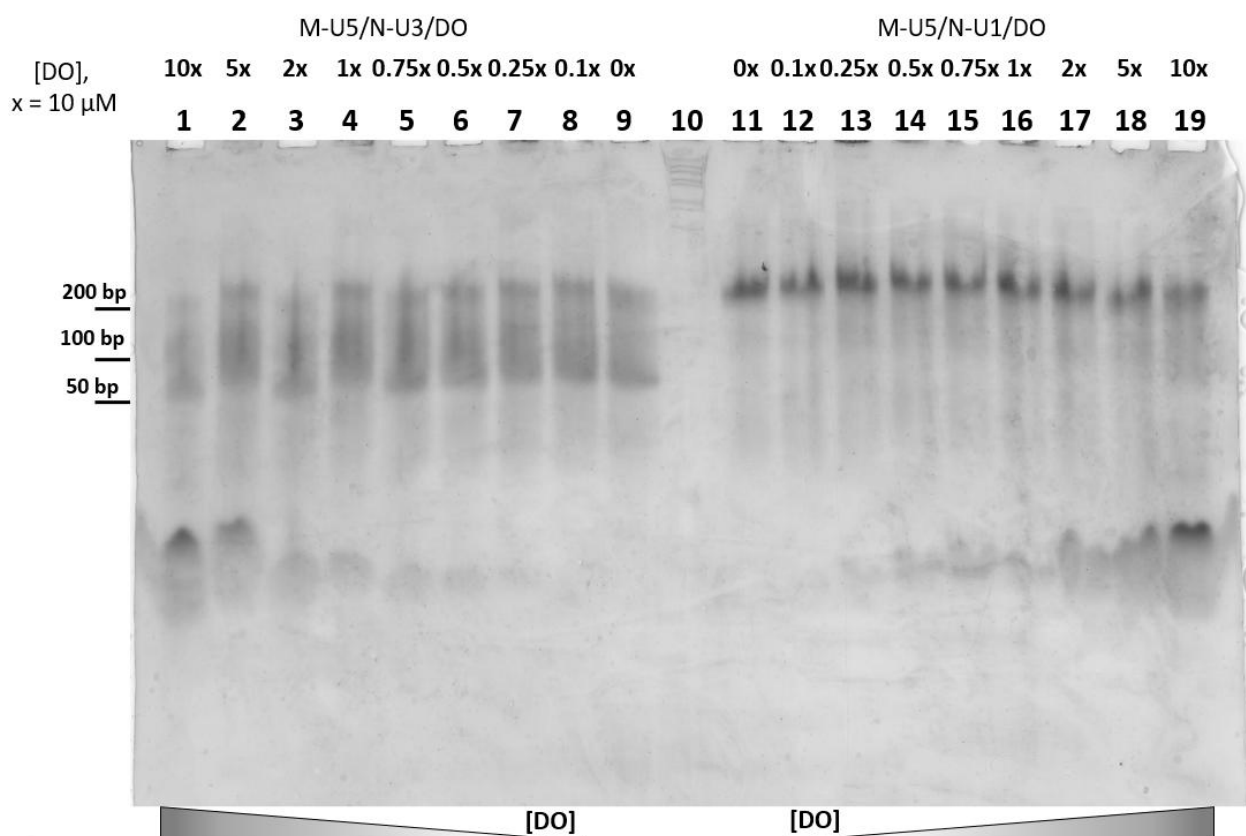

**Figure S7.** Confirmation of self-limited of complex formation. Gel shift assays of RNA complexes (M-U5/N-U1 and M-U5/N-U3) in the presence of DNA opener 5'-d(CCATCATATGAAAAA)-3' DO at different concentrations. Lanes: 1, M-U5/N-U3/DO (1 : 1 : 10); 2, M-U5/N-U3/DO (1 : 1 : 5); 3, M-U5/N-U3/DO (1 : 1 : 2); 4, M-U5/N-U3/DO (1 : 1 : 1); 5, M-U5/N-U3/DO (1 : 1 : 0.75); 6, M-U5/N-U3/DO (1 : 1 : 0.5); 7, M-U5/N-U3/DO (1 : 1 : 0.25); 8, M-U5/N-U3/DO (1 : 1 : 0.1); 9, M-U5/N-U3 (1 : 1); 10, ladder; 11, M-U5/N-U1 (1 : 1); 12, M-U5/N-U1/DO (1 : 1 : 0.1); 13, M-U5/N-U1/DO (1 : 1 : 0.25); 14, M-U5/N-U1/DO (1 : 1 : 0.5); 15, M-U5/N-U1/DO (1 : 1 : 0.75); 16, M-U5/N-U1/DO (1 : 1 : 1); 17, M-U5/N-U1/DO (1 : 1 : 2); 18, M-U5/N-U1/DO (1 : 1 : 5); 19, M-U5/N-U1/DO (1 : 1 : 10). In the brackets the ration of components concentration in the sample noted. Value 1 corresponded to 10  $\mu$ M. A dsDNA ladder of 50–1000 bp is shown on the left.

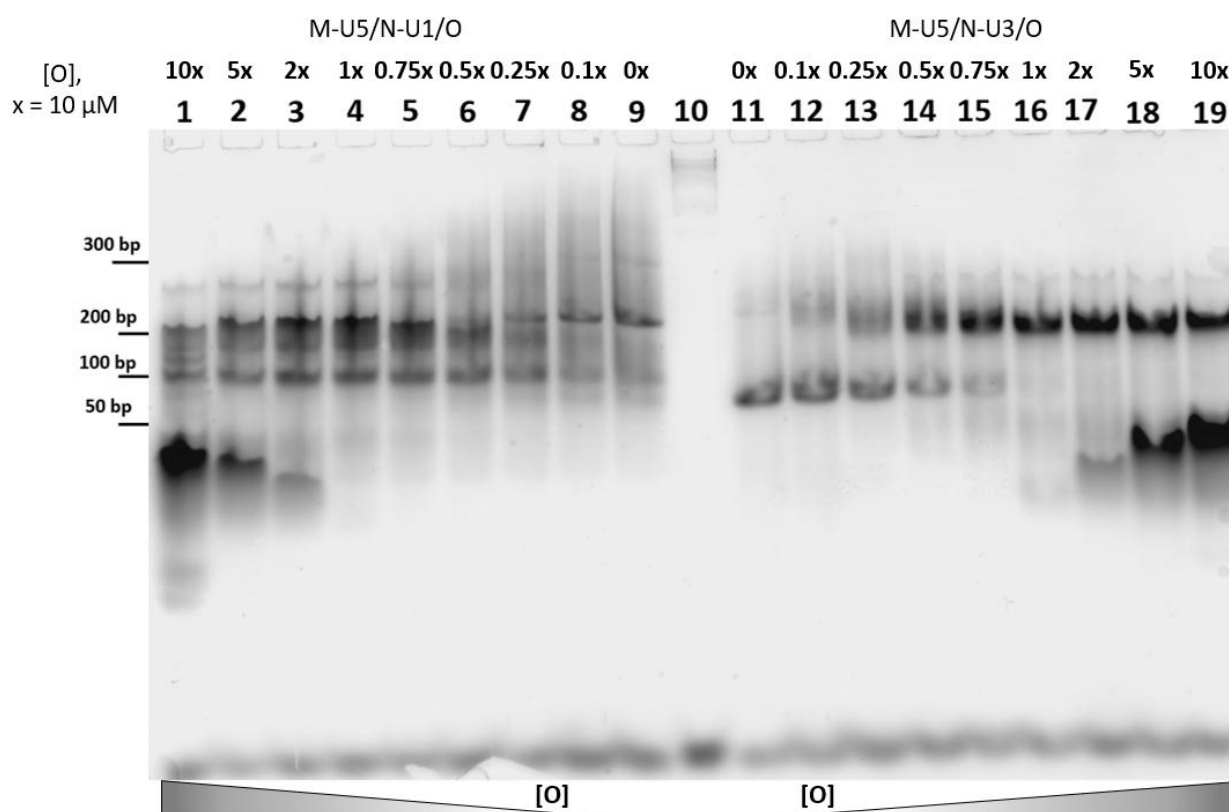

**Figure S8.** Determination of self-limited complex molecularity. Gel shift assays RNA complexes (M-U5/N-U1 and M-U5/N-U3) in the presence of RNA-opener O. Lanes: 1, M-U5/N-U1/O (1 : 1 : 10); 2, M-U5/N-U1/O (1 : 1 : 5); 3, M-U5/N-U1/O (1 : 1 : 2); 4, M-U5/N-U1/O (1 : 1 : 1); 5, M-U5/N-U1/O (1 : 1 : 0.75); 6, M-U5/N-U1/O (1 : 1 : 0.5); 7, M-U5/N-U1/O (1 : 1 : 0.25); 8, M-U5/N-U1/O (1 : 1 : 0.1); 9, M-U5/N-U1 (1 : 1); 10, ladder; 11, M-U5/N-U3 (1 : 1); 12, M-U5/N-U3/O (1 : 1 : 0.1); 13, M-U5/N-U3/O (1 : 1 : 0.25); 14, M-U5/N-U3/O (1 : 1 : 0.5); 15, M-U5/N-U3/O (1 : 1 : 0.75); 16, M-U5/N-U3/O (1 : 1 : 1); 17, M-U5/N-U3/O (1 : 1 : 2); 18, M-U5/N-U3/O (1 : 1 : 5); 19, M-U5/N-U3/O (1 : 1 : 10). In the brackets the ration of components concentration in the sample noted. Value 1 corresponded to 10  $\mu$ M. A dsDNA ladder of 50–1000 bp is shown on the left.

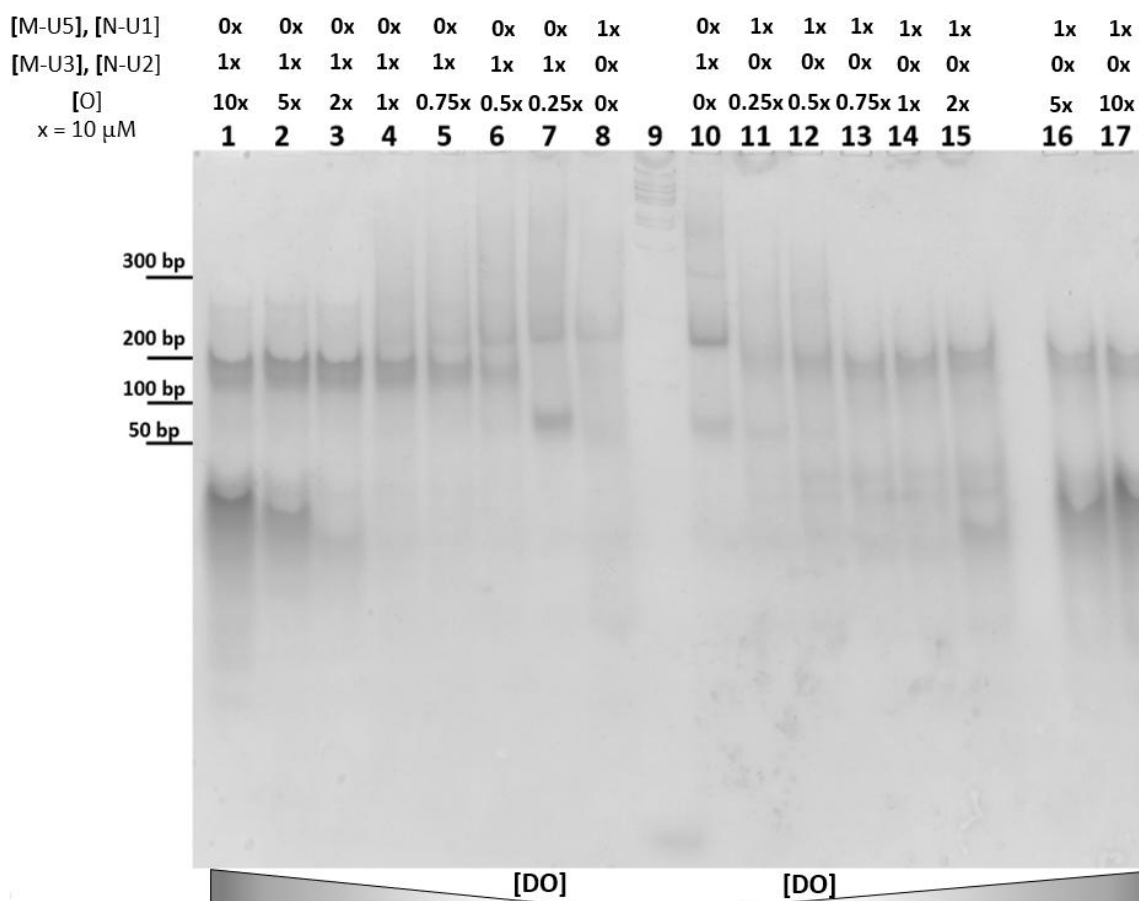

**Figure S9.** Determination of self-limited complex molecularity. Gel shift assays RNA complexes (M-U5/N-U1 and M-U3/N-U2) in the presence of RNA-opener O. Lanes: 1, M-U5/N-U1/O (1 : 1 : 10); 2, M-U5/N-U1/O (1 : 1 : 5); 3, M-U5/N-U1/O (1 : 1 : 2); 4, M-U5/N-U1/O (1 : 1 : 1); 5, M-U5/N-U1/O (1 : 1 : 0.75); 6, M-U5/N-U1/O (1 : 1 : 0.5); 7, M-U5/N-U1/O (1 : 1 : 0.25); 8, M-U3/N-U2 (1 : 1); 9, ladder; 10, M-U5/N-U1 (1 : 1); 11, M-U3/N-U2/O (1 : 1 : 0.25); 12, M-U3/N-U2/O (1 : 1 : 0.5); 13, M-U3/N-U2/O (1 : 1 : 0.75); 14, M-U3/N-U2/O (1 : 1 : 1); 15, M-U3/N-U2/O (1 : 1 : 2); 16, M-U3/N-U2/O (1 : 1 : 5); 17, M-U3/N-U2/O (1 : 1 : 10). In the brackets the ration of components concentration in the sample noted. Value 1 corresponded to 10  $\mu$ M. A dsDNA ladder of 50–1000 bp is shown on the left.



## Gel shift assay analysis of nanomachines

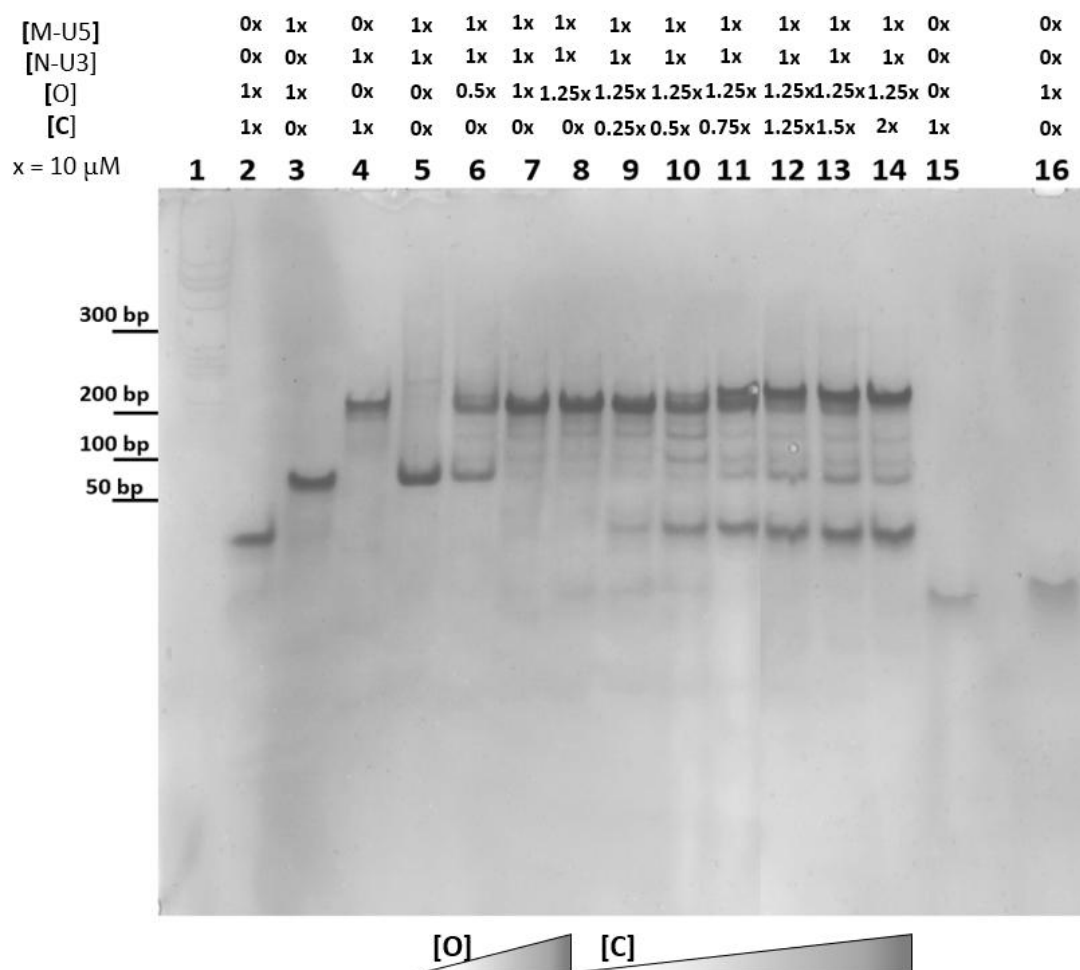

**Figure S10.** Determination of the possibility of M-U5/N-U3 complex “opening” and “closing” by adding O and C oligonucleotides, respectively. Gel shift assays of RNA complexes M-U5/N-U3 in the presence of RNA opener O and closer C at different concentrations. Lanes: 1, ladder; 2, C/O (1:1); 3, M-U5/O (1:1); 4, C/N-U3 (1:1); 5, M-U5/N-U3 (1 : 1); 6, M-U5/N-U3/O (1 : 1 : 0.5); 7, M-U5/N-U3/O (1 : 1 : 1); 8, M-U5/N-U3/O (1 : 1 : 1.25); 9, M-U5/N-U3/O/C (1 : 1 : 1.25 : 0.25); 10, M-U5/N-U3/O/C (1 : 1 : 1.25 : 0.5); 11, M-U5/N-U3/O/C (1 : 1 : 1.25 : 0.75); 12, M-U5/N-U3/O/C (1 : 1 : 1.25 : 1.25); 13, M-U5/N-U3/O/C (1 : 1 : 1.25 : 1.5); 14, M-U5/N-U3/O/C (1 : 1 : 1.25 : 2); 15, C (1); 16, O (1). The concentration of every component is equal to 10  $\mu$ M marked as 1. A dsDNA ladder of 50–1000 bp is shown on the left.

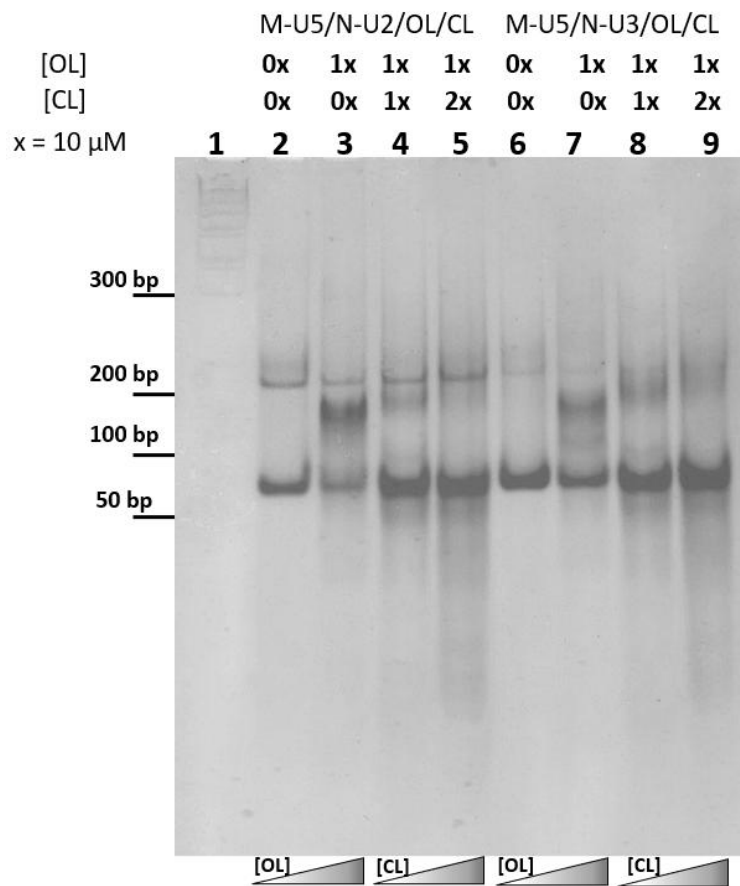

**Figure S11.** Determination of the possibility of M-U5/N-U2 and M-U5/N-U3 complex “opening” and “closing” by adding elongated OL and CL oligonucleotides, respectively. Gel shift assays of RNA complexes M-U5/N-U3 in the presence of RNA opener OL and closer CL at different concentrations. Lanes: 1, ladder; 2, M-U5/N-U2 (1 : 1); 3, M-U5/N-U2/OL (1 : 1 : 1); 4, M-U5/N-U2/OL/CL (1 : 1 : 1 : 1); 5, M-U5/N-U2/OL/CL (1 : 1 : 1 : 2); 6, M-U5/N-U3 (1 : 1); 7, M-U5/N-U3/OL (1 : 1 : 1); 8, M-U5/N-U3/OL/CL (1 : 1 : 1 : 1); 9, M-U5/N-U3/OL/CL (1 : 1 : 1 : 2). The concentration of every component is equal to 10  $\mu$ M marked as 1. A dsDNA ladder of 50–1000 bp is shown on the left.

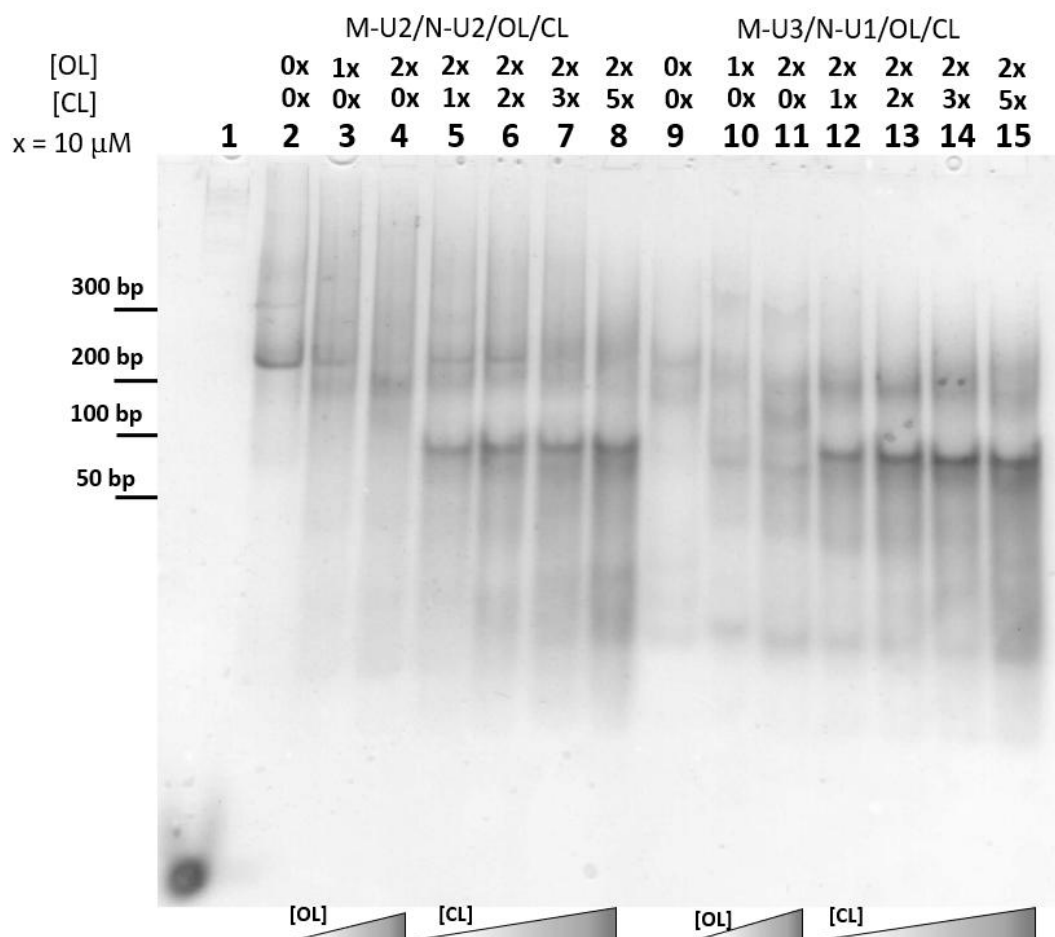

**Figure S12.** Determination of the possibility of M-U2/N-U2 and M-U3/N-U1 complex “opening” and “closing” by adding elongated OL and CL oligonucleotides, respectively. Gel shift assays of RNA complexes in the presence of RNA opener OL and closer CL at different concentrations. Lanes: 1, ladder; 2, M-U2/N-U2 (1 : 1); 3, M-U2/N-U2/OL (1 : 1 : 1); 4, M-U2/N-U2/OL (1 : 1 : 2); 5, M-U2/N-U2/OL/CL (1 : 1 : 2 : 1); 6, M-U2/N-U2/OL/CL (1 : 1 : 2 : 2); 7, M-U2/N-U2/OL/CL (1 : 1 : 2 : 3); 8, M-U2/N-U2/OL/CL (1 : 1 : 2 : 5); 9, M-U3/N-U1 (1 : 1); 10, M-U3/N-U1/OL (1 : 1 : 1); 11, M-U3/N-U1/OL (1 : 1 : 2); 12, M-U3/N-U1/OL/CL (1 : 1 : 2 : 1); 13, M-U3/N-U1/OL/CL (1 : 1 : 2 : 2); 14, M-U3/N-U1/OL/CL (1 : 1 : 2 : 3); 15, M-U3/N-U1/OL/CL (1 : 1 : 2 : 5). The concentration of every component equal to 10  $\mu$ M marked as 1. A dsDNA ladder of 50–1000 bp is shown on the left.

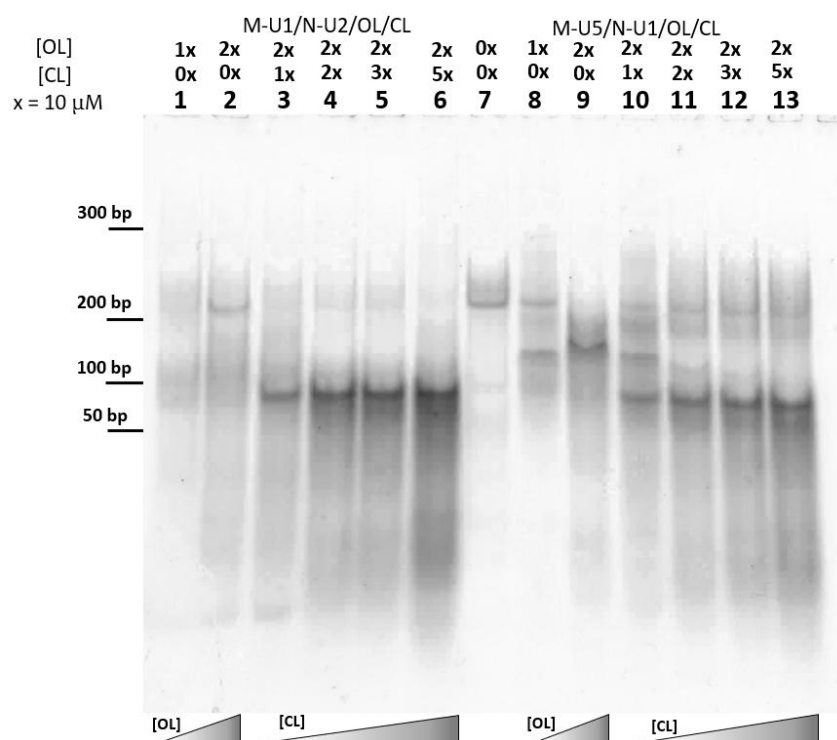

**Figure S13.** Determination of the possibility of M-U1/N-U2 and M-U5/N-U1 complex “opening” and “closing” by adding elongated OL and CL oligonucleotides, respectively. Gel shift assays of RNA complexes in the presence of RNA opener OL and closer CL at different concentrations. Lanes: 1, M-U1/N-U2/OL (1 : 1 : 1); 2, M-U1/N-U2/OL (1 : 1 : 2); 3, M-U1/N-U2/OL/CL (1 : 1 : 2 : 1); 4, M-U1/N-U2/OL/CL (1 : 1 : 2 : 2); 5, M-U1/N-U2/OL/CL (1 : 1 : 2 : 3); 6, M-U1/N-U2/OL/CL (1 : 1 : 2 : 5); 7, M-U5/N-U1 (1 : 1); 8, M-U5/N-U1/OL (1 : 1 : 1); 9, M-U5/N-U1/OL (1 : 1 : 2); 10, M-U5/N-U1/OL/CL (1 : 1 : 2 : 1); 11, M-U5/N-U1/OL/CL (1 : 1 : 2 : 2); 12, M-U5/N-U1/OL/CL (1 : 1 : 2 : 3); 13, M-U5/N-U1/OL/CL (1 : 1 : 2 : 5). The concentration of every component equal to 10  $\mu$ M marked as 1. A dsDNA ladder of 50–1000 bp is shown on the left.

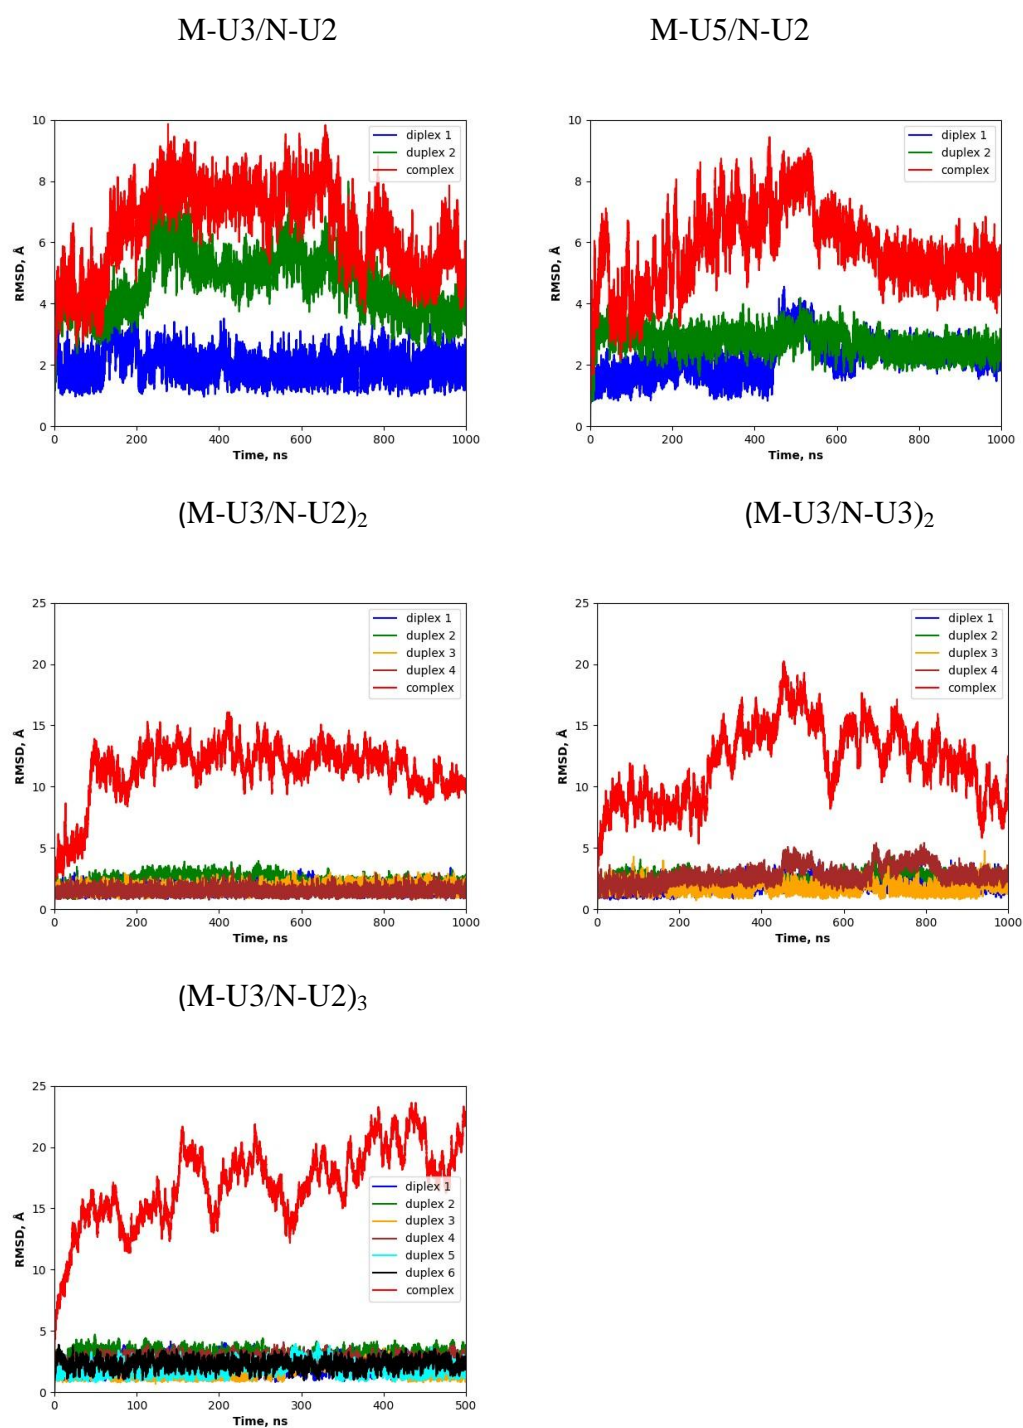

**Figure S14.** RMSD values along the MD trajectories for the complexes studied.

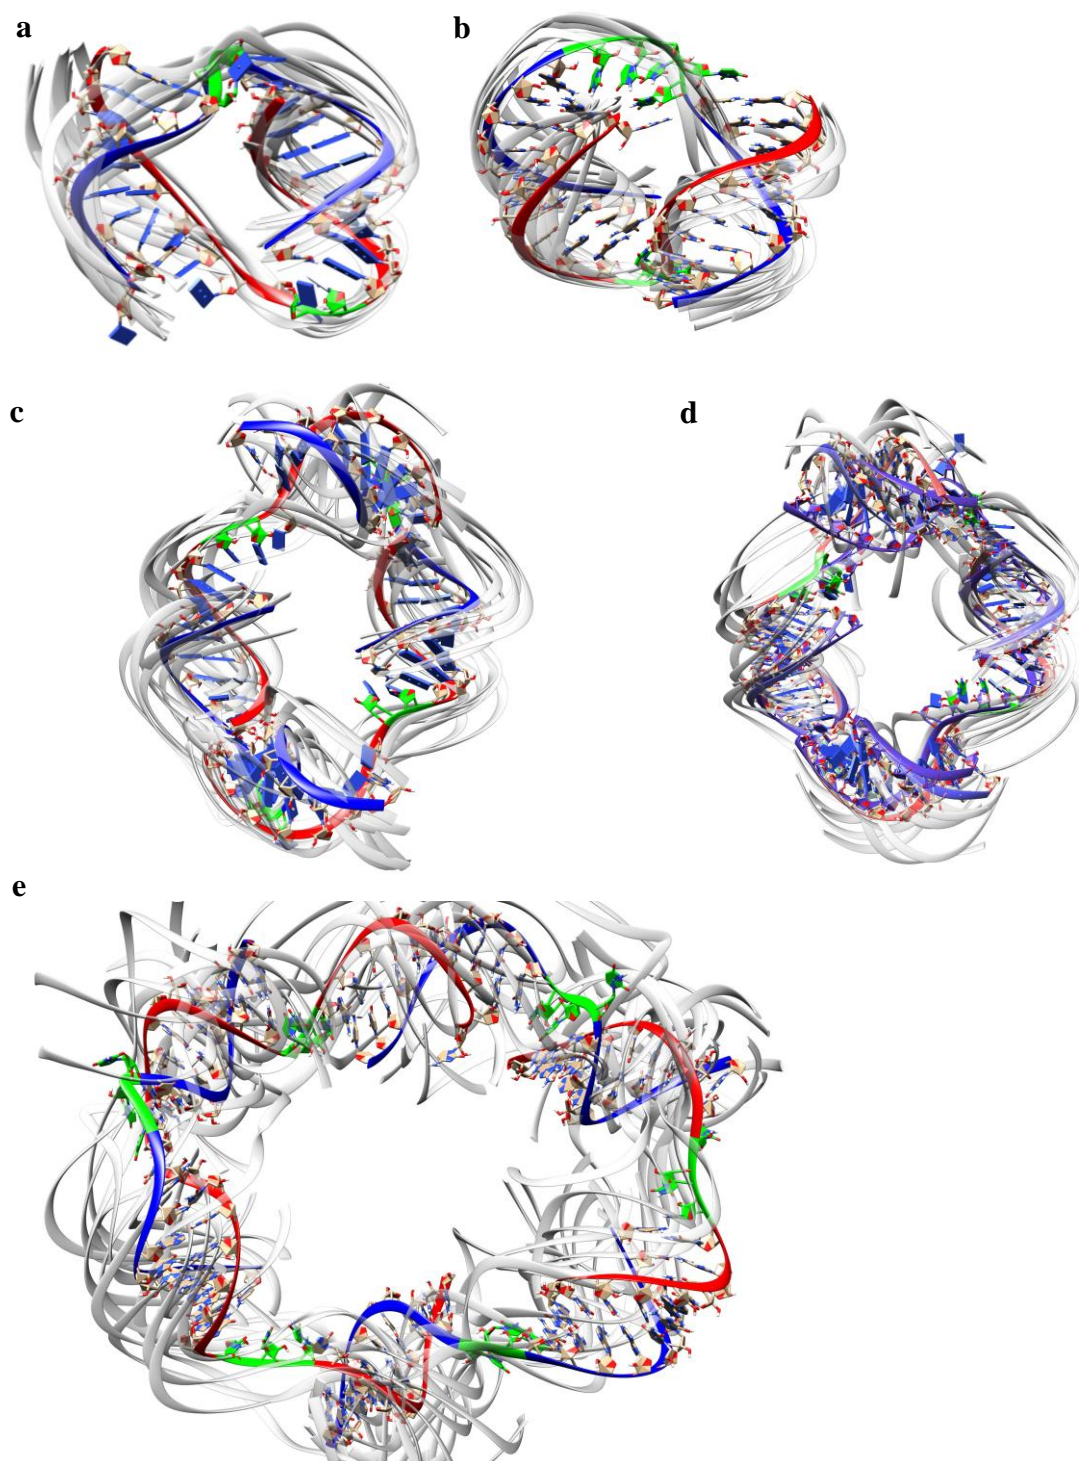

**Figure S15.** Superimposing of ten most represented in the trajectory structures RMSD of complexes obtained by hierarchical cluster analysis: values along the MD trajectories for the complexes studied: (a) M-U3/N-U2, (b) M-U5/N-U2, (c) (M-U3/N-U2)<sub>2</sub>, (d) (M-U3/N-U3)<sub>2</sub>, (e) (M-U3/N-U3)<sub>6</sub>. Most representative structures in the trajectories are shown in colors: linkers are shown as green, oligonucleotides of the M series are shown with blue backbone, and N series with red backbone. All other structures are shown as gray ribbons.
